# Supplementary material for: New metal-free catalytic degradation systems with carbon dots for thymol blue
Source: Royal Society of Chemistry journal article supplement (doi:10.1039/c7nj02642k), 2017-01-01
Supplement: c7nj02642k1.pdf [file c7nj02642k1.pdf]

## New metal-free catalytic degradation systems with carbon dots for thymol blue

Cui Zheng<sup>a</sup>, Xueqin An<sup>a,\*</sup> and Tianxiang Yin<sup>a</sup>

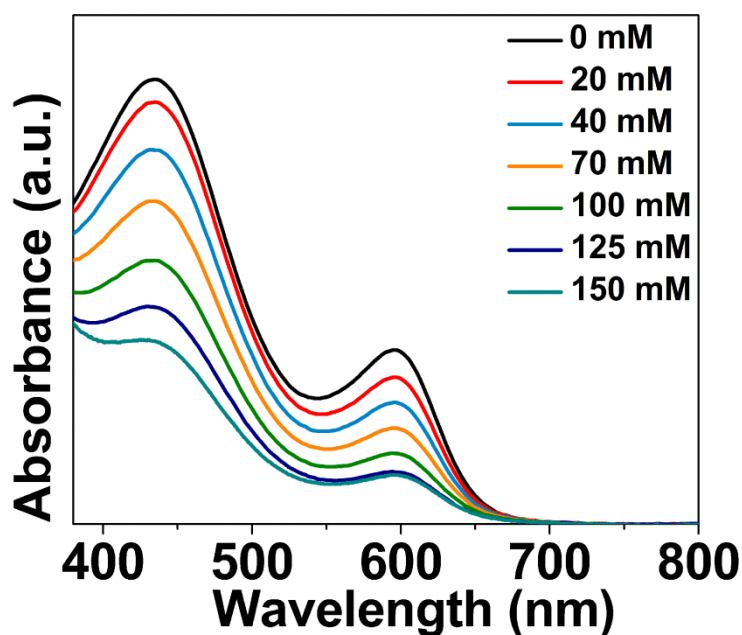

Fig S1 the UV-vis spectra of TB in the CDs/H<sub>2</sub>O<sub>2</sub> system with different H<sub>2</sub>O<sub>2</sub> concentration after 70 min at room temperature.

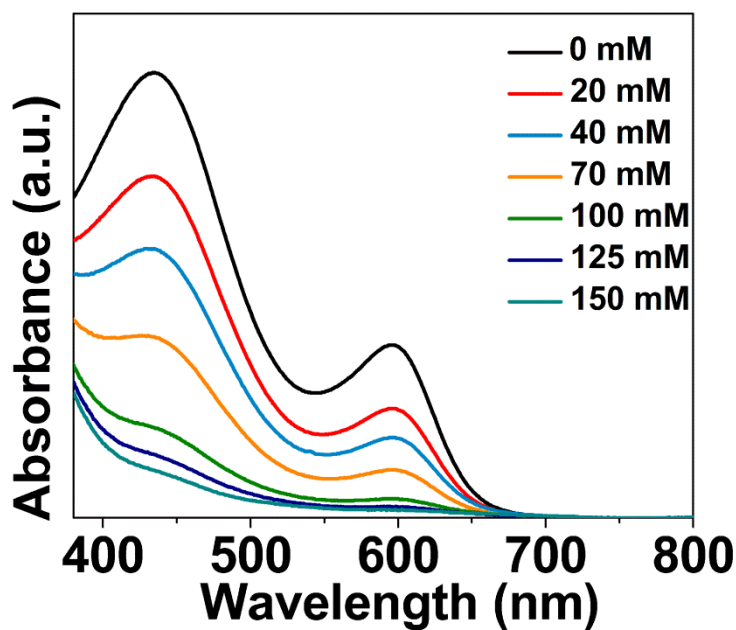

Fig S2: the UV-vis spectra of TB in the CDs/H<sub>2</sub>O<sub>2</sub>/KI system with fixed KI concentration (1 mM) and different H<sub>2</sub>O<sub>2</sub> concentration after 70 min at room temperature.

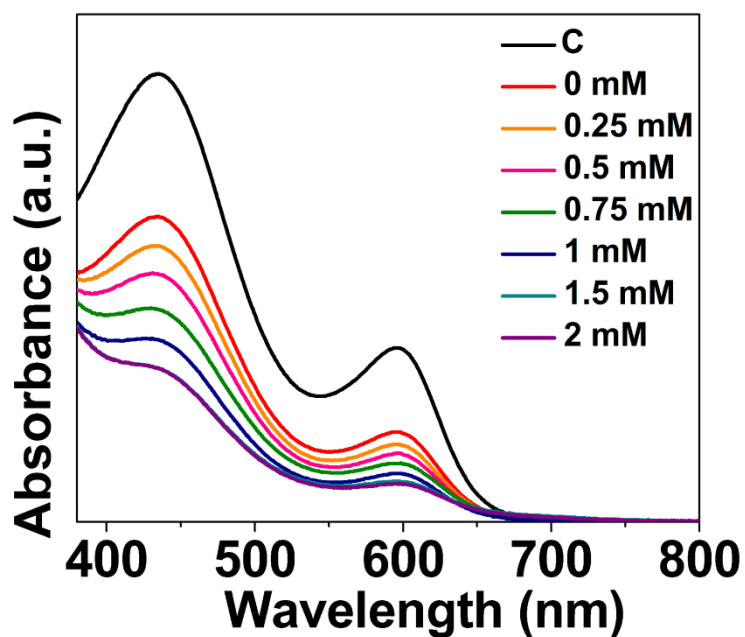

Fig S3: The UV-vis spectra of TB in the CDs/H<sub>2</sub>O<sub>2</sub>/KI system with fixed H<sub>2</sub>O<sub>2</sub> concentration (70 mM) and different KI concentration(0-2 mM) after 70 min in room temperature. And C presents the spectra of TB in the mix solution of CDs and TB after 70 min in room temperature.

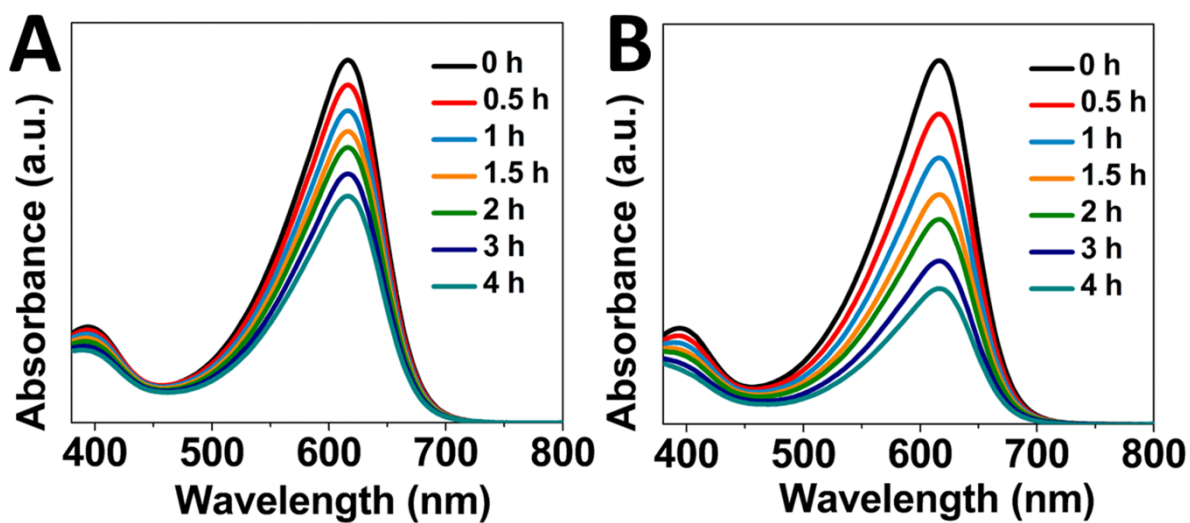

Fig S4: The UV-vis spectra of bromothymol blue in (A) CDs/H<sub>2</sub>O<sub>2</sub> system and (B) CDs/H<sub>2</sub>O<sub>2</sub>/KI system as a function of time during the catalytic degradation.
